# Supplementary material
Source: ML conference proceedings conference paper supplement (https://www.ecva.net/papers/eccv_2020/papers_ECCV/html/123700647_ECCV_2020_paper.php)
Supplement: Supplementary file 2 [file 123700647-supp.zip]

Archive with 3 entries (3 files):
- 5155_supp.pdf
- SumMe_Video3_Summary.avi
- TVSum_Video36_Summary.avi
